# Supplementary material for: A series of organopolymolybdate polymers linked by dual fuses: metal–organic moiety and organic ligand through Mo–N bonds
Source: Royal Society of Chemistry journal article supplement (doi:10.1039/c1ce05649b), 2011-01-01

Supplementary Material (ESI) for Dalton Transactions  
This journal is © The Royal Society of Chemistry

**A series of organopolymolybdate polymers linked by dual fuses: metal-organic moiety and organic ligand through Mo-N bonds**

Ai-xiang Tian,<sup>a</sup> Xiao-jing Liu,<sup>a</sup> Jun Ying,<sup>a</sup> Dong-xia Zhu,<sup>b</sup> Xiu-li Wang<sup>\*a</sup> and Jun Peng<sup>b</sup>

**ELECTRONIC SUPPLEMENTARY INFORMATION**

Table S1. Selected Bond Lengths (Å) and Bond Angles (°) for Compounds 1–3.

| Compound 1                                                       |           |                     |            |
|------------------------------------------------------------------|-----------|---------------------|------------|
| Mo(3)-N(6)#1                                                     | 2.269(4)  | Cu(1)-N(1)          | 1.927(4)   |
| Cu(1)-N(5)#2                                                     | 1.929(4)  | Cu(1)-OW1           | 2.278(5)   |
| Cu(1)-O(7)                                                       | 2.331(4)  | Cu(2)-N(7)          | 1.876(4)   |
| Cu(2)-N(2)#3                                                     | 1.891(4)  | Cu(2)-O(4)          | 2.342(4)   |
| Cu(2)-O(8)                                                       | 2.763(4)  | N(1)-Cu(1)-N(5)#2   | 166.65(18) |
| OW1-Cu(1)-O(7)                                                   | 107.0(2)  | N(7)-Cu(2)-N(2)#3   | 167.76(18) |
| O(4)-Cu(2)-O(8)                                                  | 139.0(3)  |                     |            |
| Symmetry codes for 1: #1 x,y+1,z #2 -x-1,-y-1,-z #3 -x,-y,-z+1   |           |                     |            |
| Compound 2                                                       |           |                     |            |
| Mo(3)-N(1)                                                       | 2.245(4)  | Cu(1)-N(6)#1        | 1.977(4)   |
| Cu(1)-O(7)#3                                                     | 2.000(3)  | Cu(1)-OW1#3         | 2.398(4)   |
| Cu(2)-N(7)                                                       | 2.021(4)  | Cu(2)-N(10)         | 2.031(4)   |
| Cu(2)-O(13)#1                                                    | 2.373(3)  | N(6)#1-Cu(1)-N(6)#2 | 180.00(2)  |
| N(6)#1-Cu(1)-O(7)                                                | 89.96(16) | N(7)-Cu(2)-N(10)    | 89.30(18)  |
| N(7)#1-Cu(2)-N(7)                                                | 180.00(1) | N(7)-Cu(2)-O(13)#1  | 89.63(15)  |
| Symmetry codes for 2: #1 -x,-y+1,-z+2 #2 x,y-1,z+1 #3 -x,-y,-z+3 |           |                     |            |
| Compound 3                                                       |           |                     |            |
| Mo(2)-N(3)                                                       | 2.272(5)  | OW1-Cu(1)           | 2.277(5)   |
| OW2-Cu(1)                                                        | 1.996(4)  | O(7)-Cu(1)          | 1.977(4)   |
| Cu(1)-N(6)#1                                                     | 1.945(5)  | Cu(1)-N(1)          | 1.976(5)   |
| N(6)#1-Cu(1)-N(1)                                                | 167.1(2)  | N(1)-Cu(1)-O(7)     | 84.77(18)  |
| N(1)-Cu(1)-OW2                                                   | 94.08(19) | O(7)-Cu(1)-OW2      | 175.65(18) |
| Symmetry code for 3: #1 -x+1,-y,-z-1                             |           |                     |            |

**Supplementary Material (ESI) for Dalton Transactions**  
**This journal is © The Royal Society of Chemistry**

---

Fig. S1. The schematic view of the 3D framework of compound **1** (green:  $\gamma$ -Mo<sub>8</sub> anion; orange: 2D layer; pink: the b-type bte ligand).

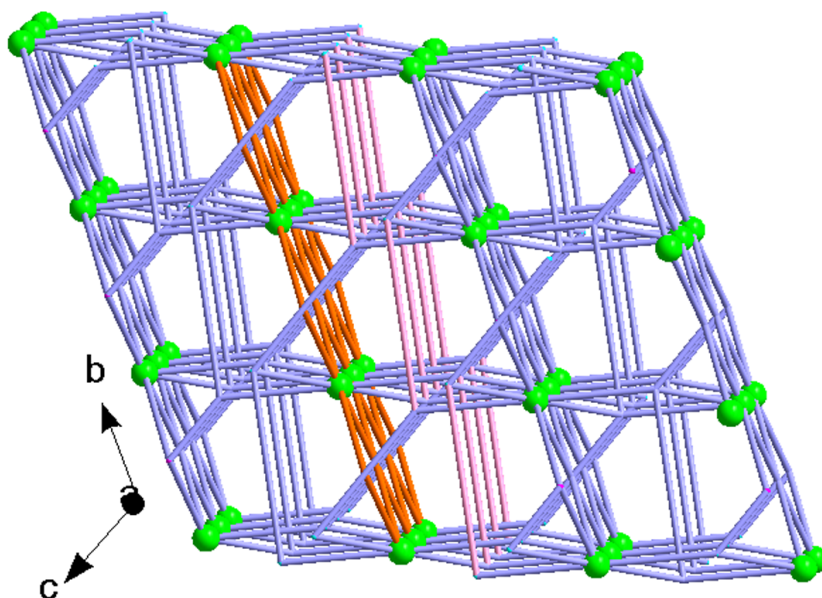

Fig. S2. The inorganic line (a) and the metal-organic line (b) in compound **2**.

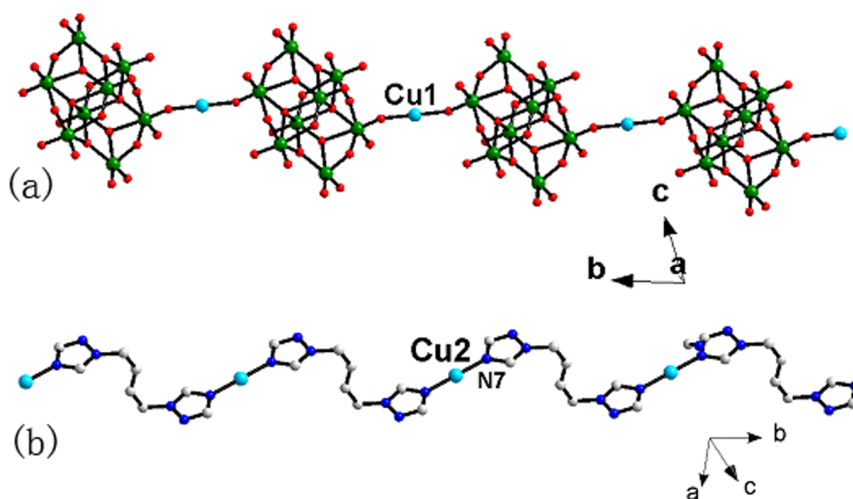

**Supplementary Material (ESI) for Dalton Transactions**  
**This journal is © The Royal Society of Chemistry**

Fig. S3. The new channel-like chain connects with each other through sharing the Cu1 ions to construct a 2D layer in compound **2**, viewing along the *a* (a) and *b* (b) axes.

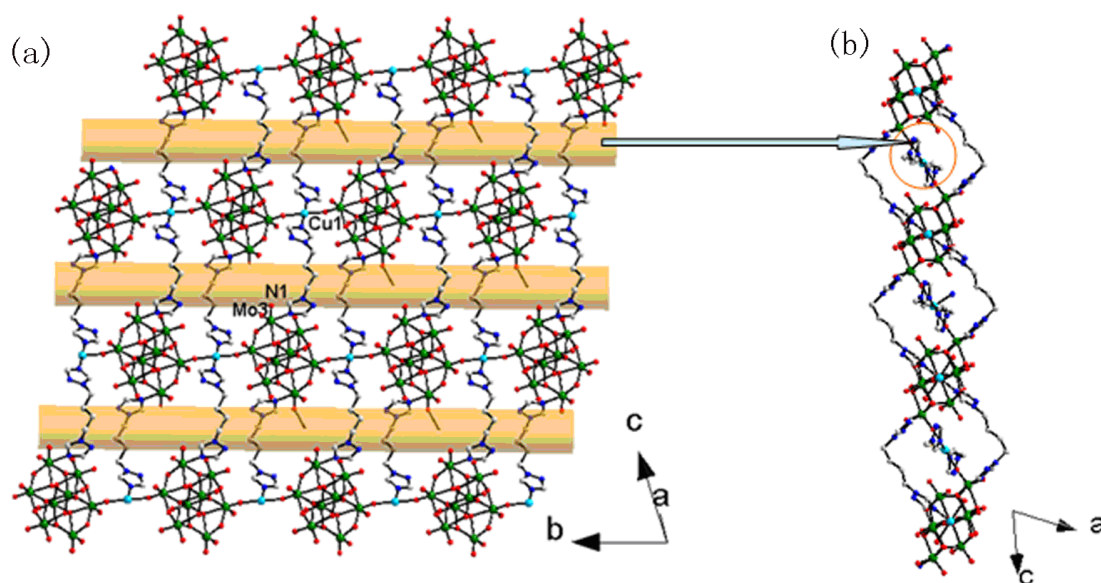

Fig. S4. The  $\gamma$ -Mo<sub>8</sub> anion in compounds **1–3** including six [MoO<sub>6</sub>] and two [MoO<sub>5</sub>] clusters.

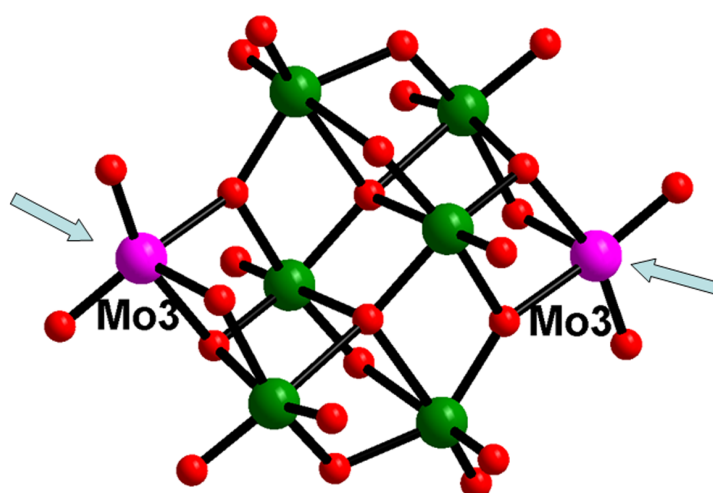

Supplementary Material (ESI) for Dalton Transactions  
This journal is © The Royal Society of Chemistry

Fig. S5. IR spectra of compounds 1–3.

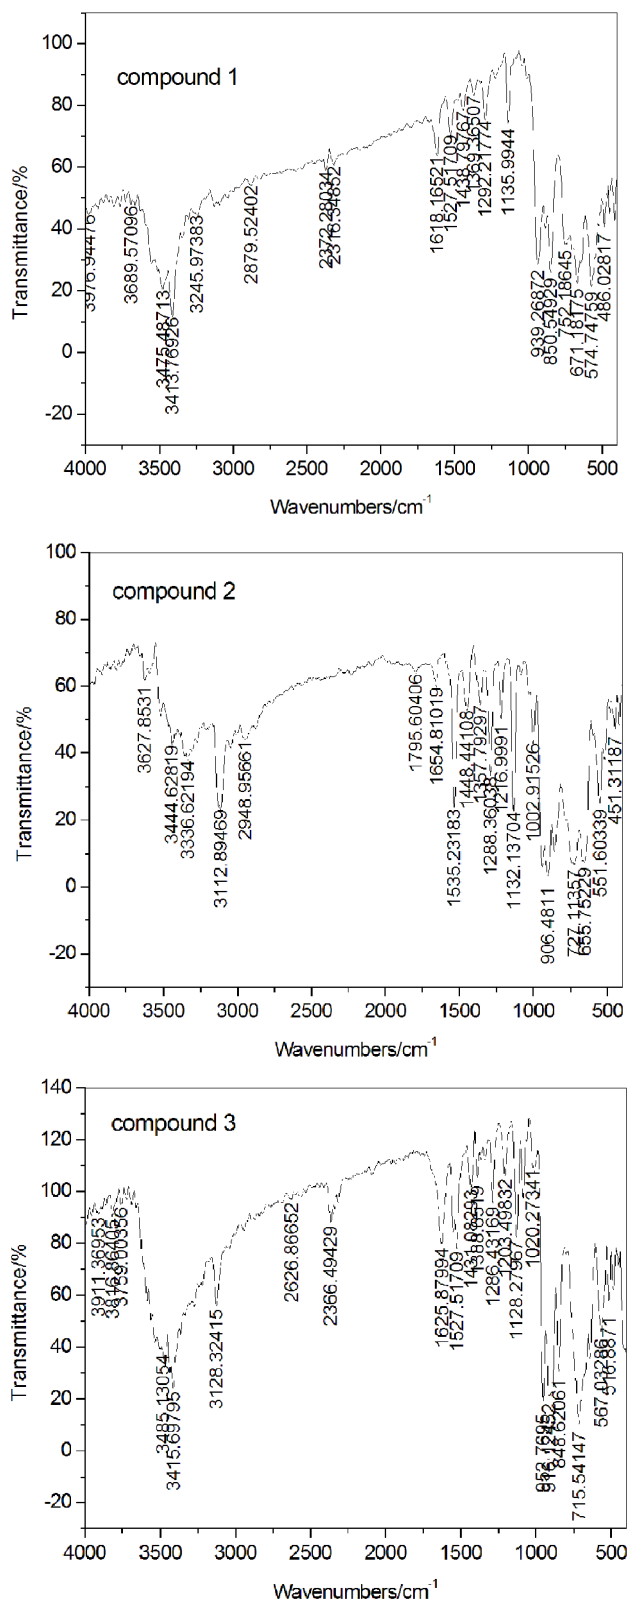

**Supplementary Material (ESI) for Dalton Transactions**  
**This journal is © The Royal Society of Chemistry**

**Fig. S6.** The simulative (blue line) and experimental (black line) powder X-ray diffraction patterns for compounds 1–3.

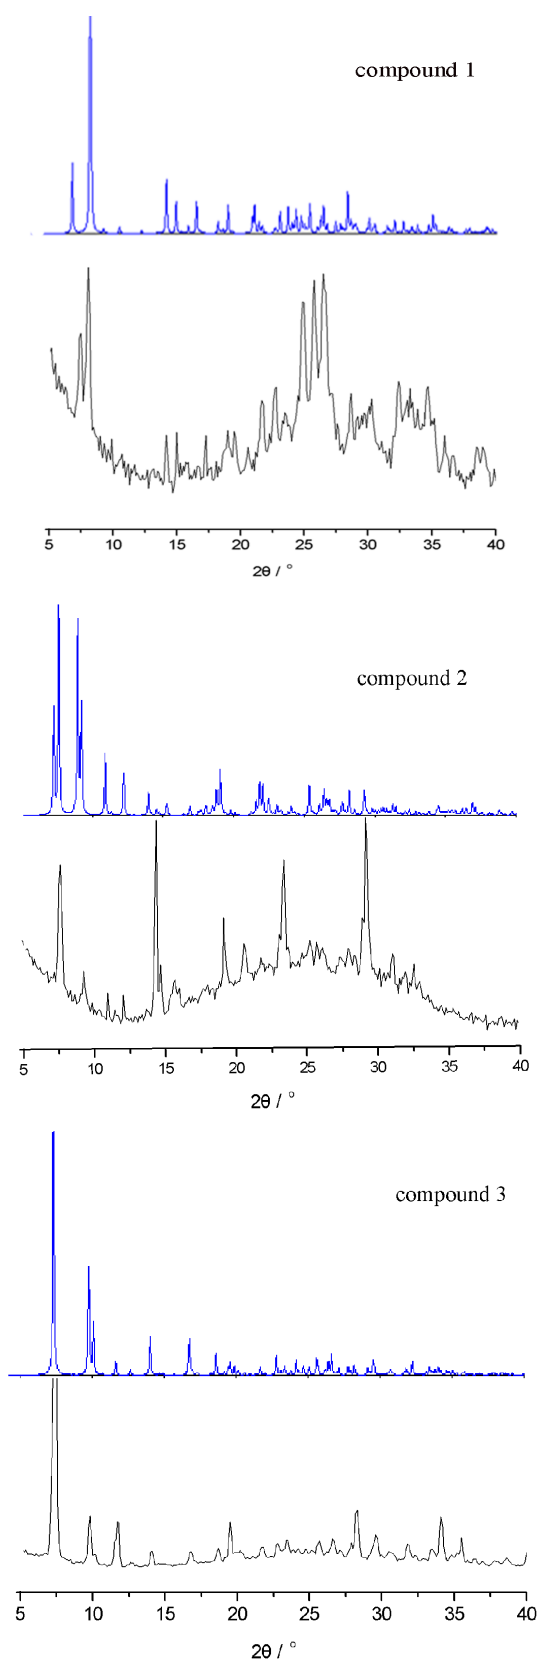

**Supplementary Material (ESI) for Dalton Transactions**  
**This journal is © The Royal Society of Chemistry**

Fig. S7. The TG analyses of compounds 1–3.

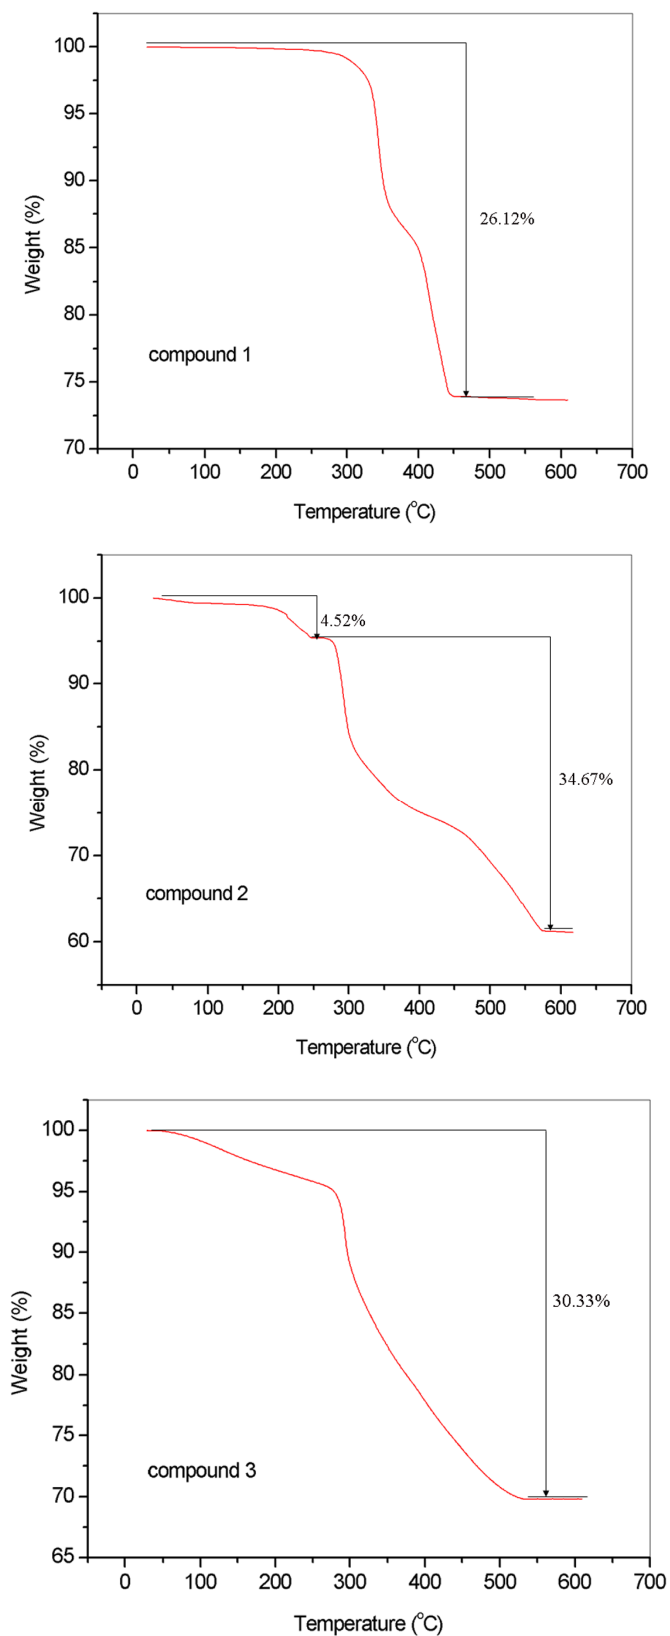

**Supplementary Material (ESI) for Dalton Transactions**  
**This journal is © The Royal Society of Chemistry**

Fig. S8. The cyclic voltammograms of the 2- and 3-CPEs in 1M H<sub>2</sub>SO<sub>4</sub> at 100 mV·s<sup>-1</sup>.

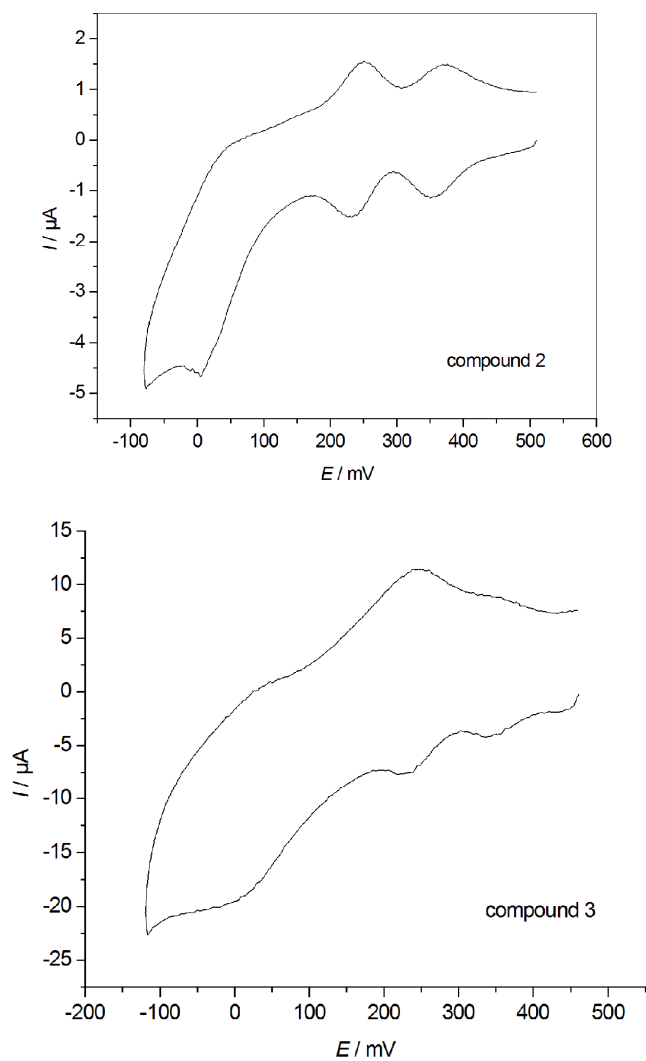

Supplement: c1ce05649b.pdf [file c1ce05649b.pdf]
